# Supplementary material for: Synthesis of Photoresponsive Dual NIR Two-Photon Absorptive [60]Fullerene Triads and Tetrads
Source: Molecules. 2013 Aug 12;18(8):9603–22. doi: 10.3390/molecules18089603 (PMC3830959; doi:10.3390/molecules18089603)
Supplement: Supplementary file 1 [file molecules-18-09603-s001.pdf]

# Supplementary Information

## S1. Spectroscopic Data

Spectroscopic characterization of **1** and **2** was performed mainly by (i) the clear detection of a group of molecular mass ion peaks with the maximum peak intensity centered at  $m/z$  1600 ( $MH^+$  of **1**) and 1258 ( $MH^+$  of **2**) (Figure S1) using positive ion matrix-assisted laser desorption/ionization (MALDI-TOF) mass spectroscopy and (ii) analyses of  $^{13}C$  NMR spectra. The former spectra were also accompanied with two groups of fragmented mass ion peaks at  $m/z$  720 and 734/735 corresponding to the mass units of  $C_{60}$  and  $C_{60}^>$ , respectively, indicating high stability of the fullerene cage under MALDI-MS conditions.

**Figure S1.** MALDI-TOF mass spectra of (a)  $C_{60}(^>CPAF-C_{2M})$  and (b)  $C_{60}(^>DPAF-C_{18})$ .

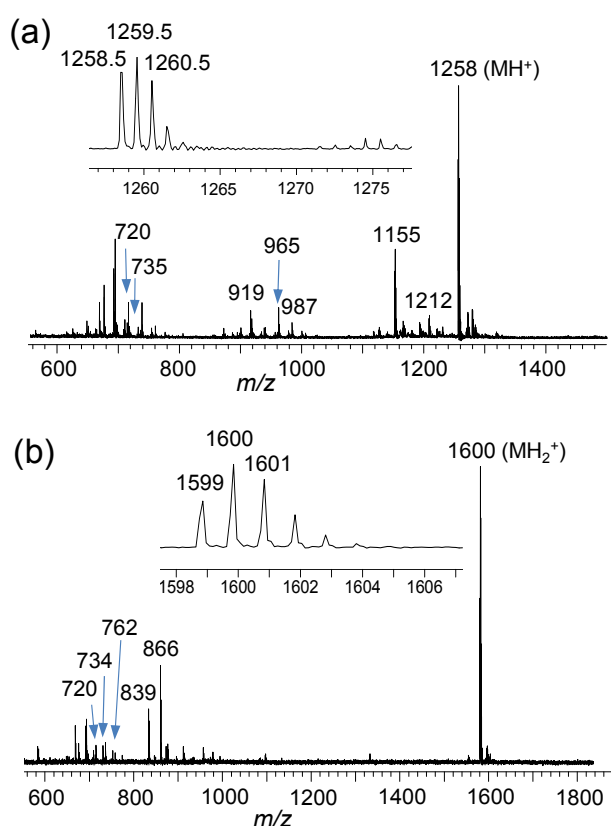

## S2. Nonlinear Optical Data

### S2.1. Z-Scan and Light-Intensity-Dependent Transmittance Measurements

Z-scan measurements and irradiance-dependent transmission measurements were carried out at the wavelength of either 780 or 980 nm using 125-fs laser pulses with the repetition rate of 1.0 kHz. Laser pulses were generated by an optical parametric amplifier system (TOPAS) pumped by a Ti-Sapphire regenerative amplifier (Spitfire Pro, Spectra Physics/Newport) and focused onto a 1.0-mm thick quartz cuvette containing a solution of methano[60]fullerene derivatives. Incident and transmitted laser intensities were monitored as the cuvette was moved (or Z-scanned) along the propagation direction of the laser pulses. The data sets were normalized to the linear transmittance and sample inhomogeneities

for all Z-scans by the correction of the background transmittance,  $T(|Z| - Z_0)$ . Total absorption was described by the change in the absorption coefficient  $\Delta\alpha = \beta I$ , where  $\beta$  and  $I$  are the 2PA coefficient and the light intensity, respectively. The absorption coefficient could be extracted from the line fitting between the Z-scan theory<sup>1</sup> and the data. The 2PA cross-section value was then calculated from the coefficient by the formula  $\sigma_2 = \beta\hbar\omega/N$ , where  $\hbar\omega$  is the photon energy and  $N$  is the number of the molecules.

**Scheme S1.** The structure of  $C_{60}$ -(antenna)<sub>x</sub> ( $x = 1$  or  $2$ ) monoadducts, hybrid bisadducts, and hybrid trisadducts.

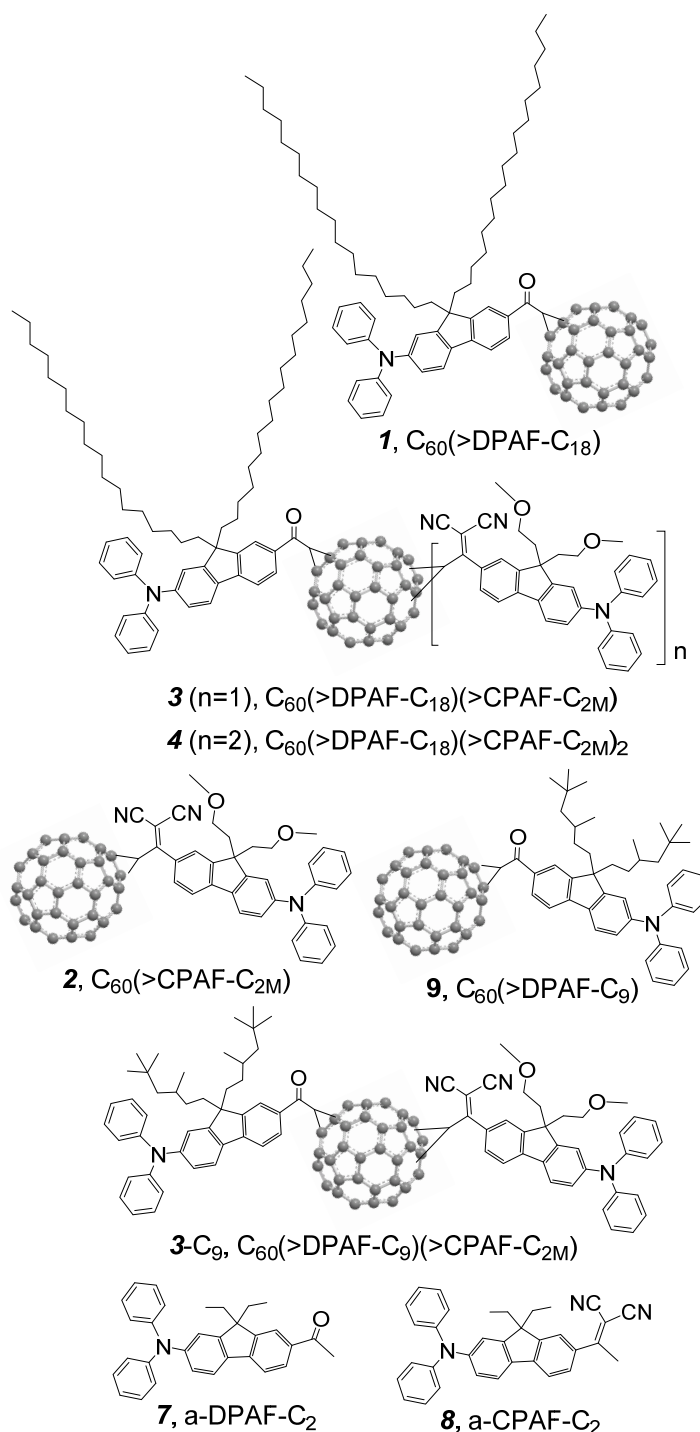

### SB.2. Two-Photon Absorption (2PA) by Both Z-Scans and Light-Intensity-Dependent Transmittance Measurements

Simultaneous 2PA cross-sections ( $\sigma_2$ ) and nonlinear light-transmittance measurements of **3** and **4** were carried out in toluene at wavelengths of either 780 or 980–1000 nm with the collection of femtosecond Z-scan data to demonstrate the nonlinear photoresponse ability of hybrid C<sub>60</sub>-(antenna)<sub>2–3</sub> analogous triads and tetrads at different near-IR wavelength ranges. A C<sub>60</sub>-(antenna)<sub>x</sub> nanostructure showing large 2PA-active NLO properties at many wavelengths or a continuous wavelength spectrum will facilitate their uses as broadband NLO materials. In the molecular structure of **3** and **4**, all chromophore components are 2PA-responsive that allows the corresponding branched C<sub>60</sub>-(antenna)<sub>x</sub> (x = 2–3) nanomaterials to exhibit appreciable 2PA cross-sections at three adjacent spectral ranges of 600–750 (based on C<sub>60</sub>> moiety), 740–900 (based on DPAF-C<sub>18</sub> moiety), and 860–1100 (based on CPAF-C<sub>2M</sub> moiety) nm. These three ranges correspond to the strong linear optical absorption band of the C<sub>60</sub>> cage at 280–375 nm, the DPAF-C<sub>18</sub> antenna at 370–450 nm, and the CPAF-C<sub>2M</sub> antenna at 430–550 nm. By tuning the ratio of CPAF-C<sub>2M</sub>/DPAF-C<sub>18</sub> to two, a nearly even linear absorption extinction coefficient over 400–520 nm was achieved for creating the corresponding broadband 2PA features over 800–1050 nm with no apparent absorption minimum.

The use of fs pulses eliminates potential accumulative thermal scattering effects in the material environment. A pulse duration width of 125 fs was used to focus the study primarily on the 2PA process of each antenna. This pulse width matches with the value of 130 fs required for the effective intramolecular energy-transfer from the excited antenna to the C<sub>60</sub>> moiety, as discussed above. Therefore, the measured  $\sigma_2$  values at 125 fs should not cover the excited singlet state absorption ( $S_1-S_n$ ) of <sup>1</sup>C<sub>60</sub>\*(>DPAF-C<sub>18</sub>)(>CPAF-C<sub>2M</sub>)<sub>1or2</sub> cage moiety. As a result, open-aperture Z-scan data of two hybrid triads C<sub>60</sub>(>DPAF-C<sub>9</sub>)(>CPAF-C<sub>2M</sub>) and C<sub>60</sub>(>DPAF-C<sub>18</sub>)(>CPAF-C<sub>2M</sub>) **3** and one hybrid tetrad C<sub>60</sub>(>DPAF-C<sub>18</sub>)(>CPAF-C<sub>2M</sub>)<sub>2</sub> **4** at 780–800 and 980 nm in toluene under different conditions were shown in Figure S2 with all parameters summarized in Table S1. For the comparison and discussion purpose, the  $\sigma_2$  values of C<sub>60</sub>(>CPAF-C<sub>9</sub>) and C<sub>60</sub>(>DPAF-C<sub>9</sub>) were also included. The method for data reduction, line fitting, and 2PA cross-section calculation was described in the experimental section.

We used the sample of C<sub>60</sub>(>CPAF-C<sub>9</sub>) to demonstrate the strong concentration-dependent  $\sigma_2$  values through solution concentration between 10<sup>−3</sup>–10<sup>−2</sup> M (Table S1) owing to the aggregation effect. Only a moderate  $\sigma_2$  value of 46 GM was measured at the concentration of 1.0 × 10<sup>−2</sup> M. A 5–6 folds increase of the  $\sigma_2$  value to 275 GM was achieved by simply decreasing the concentration to 1.0 × 10<sup>−3</sup> M. The phenomena were much more pronounced for the dyad C<sub>60</sub>(>DPAF-C<sub>9</sub>) when the irradiation wavelength of 780 nm matched with two-photon absorption of DPAF-C<sub>9</sub> antenna. In this case, a 70-fold increase in the  $\sigma_2$  value to 2190 GM was measured at 1.0 × 10<sup>−4</sup> M, as compared with a 30 GM value at 1.0 × 10<sup>−2</sup> M.<sup>2</sup> Since the 2PA measurement was performed at the focal area of the laser pulse, the signal intensity could be as low at 10<sup>−4</sup> M leading to less accuracy in the calculation and line-fitting of the Z-scan data. Therefore, we used a medium concentration of 2.0–5.0 × 10<sup>−3</sup> M for this study.

**Figure S2.** Open-aperture Z-scan profiles of (a)  $C_{60}(>>DPAF-C_9)(>>CPAF-C_{2M})$  using laser pulses working at 780 nm with a 150-fs duration ( $[C] = 1.6 \times 10^{-3}$  M in toluene), (b)  $C_{60}(>>DPAF-C_{18})(>>CPAF-C_{2M})$  **3** and  $C_{60}(>>DPAF-C_{18})(>>CPAF-C_{2M})_2$  **4** using 125 fs laser pulses operated at 800 nm and the input intensity of  $270 \text{ GW/cm}^2$ , and (c) fullerene derivatives  $C_{60}(>>DPAF-C_9)$ ,  $C_{60}(>>CPAF-C_9)$ , **3**, and **4** using 125-fs laser pulses operated at 980 nm and the input intensity of  $104 \text{ GW/cm}^2$ . Measurements of (b) and (c) were carried out at the concentration of  $5 \times 10^{-3}$  M in toluene.

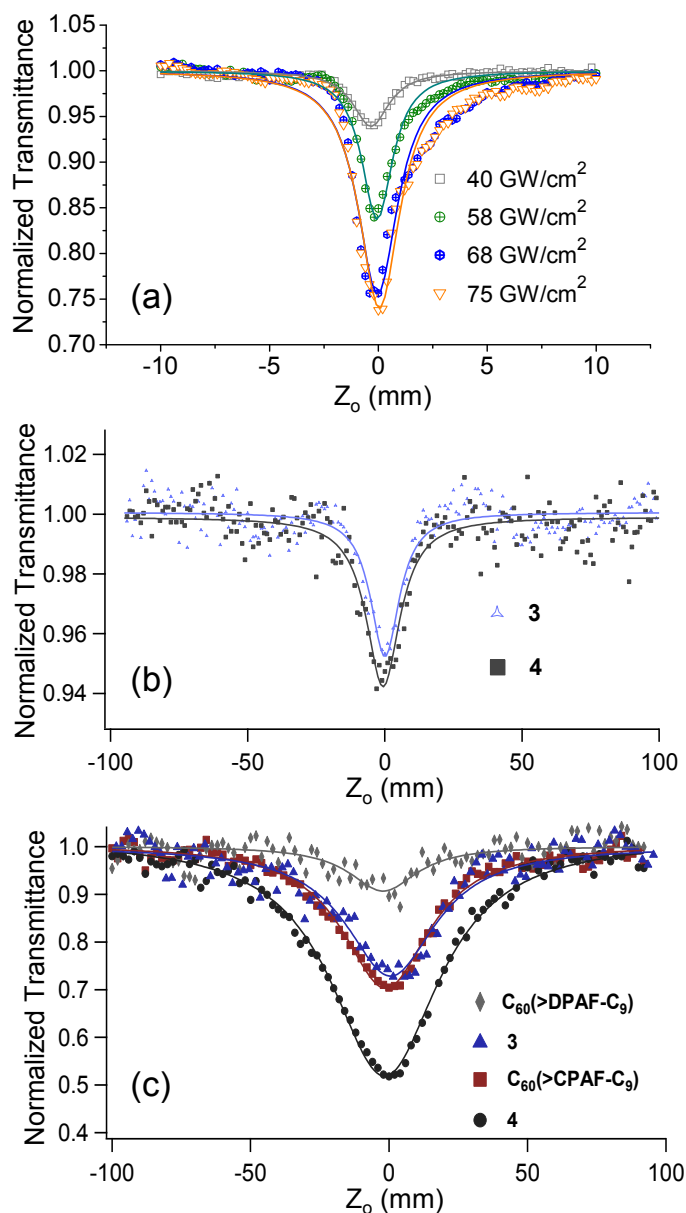

**Table S1.** Two-photon Absorption Cross-sections ( $\sigma_2$ ) of Dyads  $C_{60}(>>DPAF-C_9)$  and  $C_{60}(>>CPAF-C_9)$ , Hybrid Triads **3** and **3-C<sub>9</sub>**, and the Hybrid Tetrad **4** at 780 nm <sup>a</sup>.

| Compound                            | [C]/M                | $I/GW\text{ cm}^{-2}$ | $\beta/cm\text{ GW}^{-1}$ | $\sigma_2/10^{-48}\text{ cm}^4\text{ s photon}^{-1}\text{ molecule}^{-1}$ |
|-------------------------------------|----------------------|-----------------------|---------------------------|---------------------------------------------------------------------------|
| $C_{60}(>>DPAF-C_9)$ <sup>b</sup>   | $1.0 \times 10^{-4}$ | 163                   | 0.036                     | 21.9 (2190 GM) <sup>c</sup>                                               |
|                                     | $1.9 \times 10^{-3}$ | 163                   | 0.080                     | 8.0 (800 GM) <sup>c</sup>                                                 |
|                                     | $1.0 \times 10^{-2}$ | 163                   | 0.100                     | 0.3 (30 GM) <sup>c</sup>                                                  |
| $C_{60}(>>CPAF-C_9)$ <sup>d</sup>   | $1.0 \times 10^{-3}$ | 220                   | 0.0065                    | 2.75 (275 GM)                                                             |
|                                     | $2.0 \times 10^{-3}$ | 220                   | 0.0080                    | 1.69 (169 GM)                                                             |
|                                     | $1.0 \times 10^{-2}$ | 220                   | 0.0110                    | 0.46 (46 GM)                                                              |
| <b>3-C<sub>9</sub></b> <sup>e</sup> | $1.6 \times 10^{-3}$ | 40                    | 0.035                     | 1.30 (130 GM)                                                             |
| <b>3</b>                            | $5.0 \times 10^{-3}$ | 270                   | 0.034                     | 2.21 (221 GM)                                                             |
| <b>4</b>                            | $5.0 \times 10^{-3}$ | 270                   | 0.04                      | 2.66 (266 GM)                                                             |

<sup>a</sup> Measured using laser pulses working with a 125-fs duration and a repetition rate of 1.0 kHz, or with different conditions indicated. <sup>b</sup> Measured in CS<sub>2</sub> with 150-fs laser pulses at 800 nm. <sup>c</sup> Corrected value by deduction of the  $\beta$  value of CS<sub>2</sub> as the background correction. <sup>d</sup> Measured in THF with 226-fs laser pulses.

<sup>e</sup> The triad  $C_{60}(>>DPAF-C_9)(>>CPAF-C_{2M})$  measured in toluene with 150-fs laser pulses at 800 nm.

It is interesting to note that, even though the irradiation wavelength of 780 nm was not the best fit to the 2PA absorption  $\lambda_{\max}$  of  $C_{60}(>>CPAF-C_9)$  at 1000 nm, we still observed appreciable cross-section values. This could be owing to  $C_{60}(\text{antenna})_x$  nanostructures in general acting as broadband NLO materials since the optical absorption of the chromophore component covers a broad wavelength range. In the comparison between hybrid triads **3**,  $C_{60}(>>DPAF-C_{18})(>>CPAF-C_{2M})$ , and **3-C<sub>9</sub>**,  $C_{60}(>>DPAF-C_9)(>>CPAF-C_{2M})$ , we noticed that the use of long *n*-octadecyl chains (C<sub>18</sub>) in **3** increased the solubility of nanostructure in toluene, as compared with that of the branched 3,5,5-trimethylhexyl (C<sub>9</sub>) groups in **3-C<sub>9</sub>**, and was able to produce a slightly higher 2PA  $\sigma_2$  value of 221 GM, even though the measurement was made by a solution with 3 times higher in concentration. This value is much lower than that of  $C_{60}(>>DPAF-C_9)$  in CS<sub>2</sub>. Apparently, the solvent effect arising from CS<sub>2</sub> may play a significant role in the value of  $\sigma_2$ . For the hybrid tetrad **4**, the  $\sigma_2$  value of 266 GM was slightly higher than that of **3** since the number of photoresponsive DPAF-C<sub>18</sub> antenna was the same for both structures. An additional CPAF-C<sub>2M</sub> antenna in **4** increased its  $\sigma_2$  value by 45 GM.

The second set of Z-scan experiments were performed in toluene using a pulse laser with a 125-fs pulse duration width at 980 nm to match with the linear absorption  $\lambda_{\max}$  of the CPAF-C<sub>2M</sub> antenna at 500 nm. As expected, the 2PA cross-section values of  $C_{60}(>>DPAF-C_9)$  as 85 ( $I = 48$ ) and 130 ( $I = 104\text{ GM/cm}^2$ ) GM (Table S2) were found to be moderate at the concentration of  $5.0 \times 10^{-3}\text{ M}$  since the 2PA energy at 980 nm is less than the main linear absorption  $\lambda_{\max}$  (408 nm) of the DPAF-C<sub>9</sub> antenna. Higher 2PA  $\sigma_2$  values of 450 ( $I = 48$ ) and 538 ( $I = 104\text{ GM/cm}^2$ ) GM for  $C_{60}(>>CPAF-C_9)$  were measured in similar experiments, consistent with using well-matched absorption and excitation wavelengths. With an additional DPAF-C<sub>18</sub> arm attached to the structure of **3**, no increase of  $\sigma_2$  values was found with  $\sigma_2 = 504\text{ GM}$  ( $I = 104\text{ GM/cm}^2$ ) in the same range as that of  $C_{60}(>>CPAF-C_9)$ . As the number of 980-nm-responsive antenna was increased to two in the structure of hybrid tetrad **4**,  $C_{60}(>>DPAF-C_{18})(>>CPAF-C_{2M})_2$ , the  $\sigma_2$  values were doubled to 995 ( $I = 48$ ) and 1100

( $I = 104 \text{ GW/cm}^2$ ) GM. These data further demonstrated the suitability of **3** and **4** to be used as broadband NLO materials at 780–1000 nm.

**Table S2.** Two-photon Absorption Cross-sections ( $\sigma_2$ ) of Hybrid Dyads  $C_{60}(>>\text{DPAF-C}_9)$  and  $C_{60}(>>\text{CPAF-C}_9)$ , the Hybrid Triad **3**, and the Hybrid Tetrad **4** at 980 nm in Toluene <sup>a</sup>.

| Compound                    | [C]/M                | $I/\text{GW cm}^{-2}$ | $\beta/\text{cm GW}^{-1}$ | $\sigma_2/10^{-48} \text{ cm}^4 \text{ s photon}^{-1} \text{ molecule}^{-1}$ |
|-----------------------------|----------------------|-----------------------|---------------------------|------------------------------------------------------------------------------|
| $C_{60}(>>\text{DPAF-C}_9)$ | $5.0 \times 10^{-3}$ | 104                   | 0.0198                    | 1.3 (130 GM)                                                                 |
|                             |                      | 48                    | 0.0129                    | 0.85 (85 GM)                                                                 |
| $C_{60}(>>\text{CPAF-C}_9)$ | $5.0 \times 10^{-3}$ | 104                   | 0.0815                    | 5.38 (538 GM)                                                                |
|                             |                      | 48                    | 0.0677                    | 4.5 (450 GM)                                                                 |
| <b>3</b>                    | $5.0 \times 10^{-3}$ | 104                   | 0.0765                    | 5.04 (504 GM)                                                                |
|                             |                      | 48                    | 0.0468                    | 3.1 (310 GM)                                                                 |
| <b>4</b>                    | $5.0 \times 10^{-3}$ | 104                   | 0.166                     | 11 (1100 GM)                                                                 |
|                             |                      | 48                    | 0.144                     | 9.5 (950 GM)                                                                 |

<sup>a</sup> Measured using laser pulses working with a 125-fs pulse duration and the light intensity  $I$  indicated.

Nonlinear light-transmittance measurements of  $C_{60}(>>\text{CPAF-C}_9)$ , **3**, and **4** were performed as a function of irradiance intensity with 125-fs laser pulses at 980 nm with the concentration of  $5 \times 10^{-3} \text{ M}$  in toluene. As shown in Figure S3(c), the Z-scans displayed positive signs for absorption nonlinearities with a decreasing trend of light-transmittance in the order of  $\mathbf{4} > \mathbf{3} \approx C_{60}(>>\text{CPAF-C}_9) > C_{60}(>>\text{DPAF-C}_9)$  in solution with the input intensity of  $104 \text{ GW/cm}^2$ . Accordingly, the plot of transmittance (%) vs irradiance ( $\text{GW/cm}^2$ ) of all samples showed a linear transmission ( $T = \sim 95\%$ ) with input intensity of up to  $20 \text{ GW/cm}^2$ . When the incident light intensity was increased above  $30 \text{ GW/cm}^2$ , the transmittance (%) began to deviate from the linear transmission line and decrease indicating the initiation of nonlinearity and the transmittance reduction effect. The transmitted fluence further departed from the linear line upon the increase in the incident fluence. A trend showing higher efficiency in reducing light-transmittance down to 50, 55, and 35% for  $C_{60}(>>\text{CPAF-C}_9)$ , **3**, and **4**, respectively, was observed with the increase of light intensity up to  $110 \text{ GW/cm}^2$  (Figure S3). The observed improvement in lowering the transmitted light-intensity by **4** is consistent with its better nonlinear contribution that can be correlated to its higher fs 2PA cross-sections, as shown by the Z-scans.

**Figure S3.** Nonlinear transmittance of (a)  $C_{60}(>>CPAF-C_9)$ , (b)  $C_{60}(>>DPAF-C_{18})(>>CPAF-C_{2M})$ , and (c)  $C_{60}(>>DPAF-C_{18})(>>CPAF-C_{2M})_2$  as a function of light intensity. All measurements were carried out with 125-fs laser pulses operated at 980 nm and the concentration of  $5 \times 10^{-3}$  M in toluene.

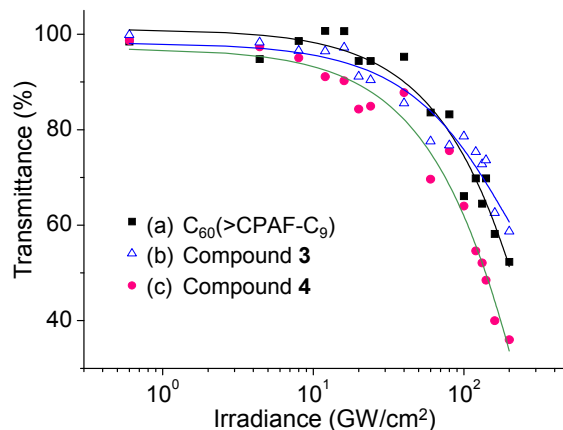

## References

1. Sheik-Bahae, M.; Said, A.A.; Wei, T.H.; Hagan, D.J.; Van Stryland, E.W. *IEEE J. Quantum Electron.* **1990**, *26*, 760–769.
2. Elim, H.I.; Anandakathir, R.; Jakubiak, R.; Chiang, L.Y.; Ji, W.; Tan, L.-S. Large concentration-dependent nonlinear optical responses of starburst diphenylamino-fluorencarbonyl methano[60]fullerene pentaads. *J. Mater. Chem.* **2007**, *17*, 1826–1838.
